# Supplementary material for: Salinity-Driven Dynamics of the Ulva-Associated Virome and Their Implications for Holobiont Adaptation
Source: Research Square preprint supplement (doi:10.21203/rs.3.rs-7989466/v1), 2026-02-23
Supplement: Supplementary file 1 [file 5914d59628e9fd1be924b6d8.docx]

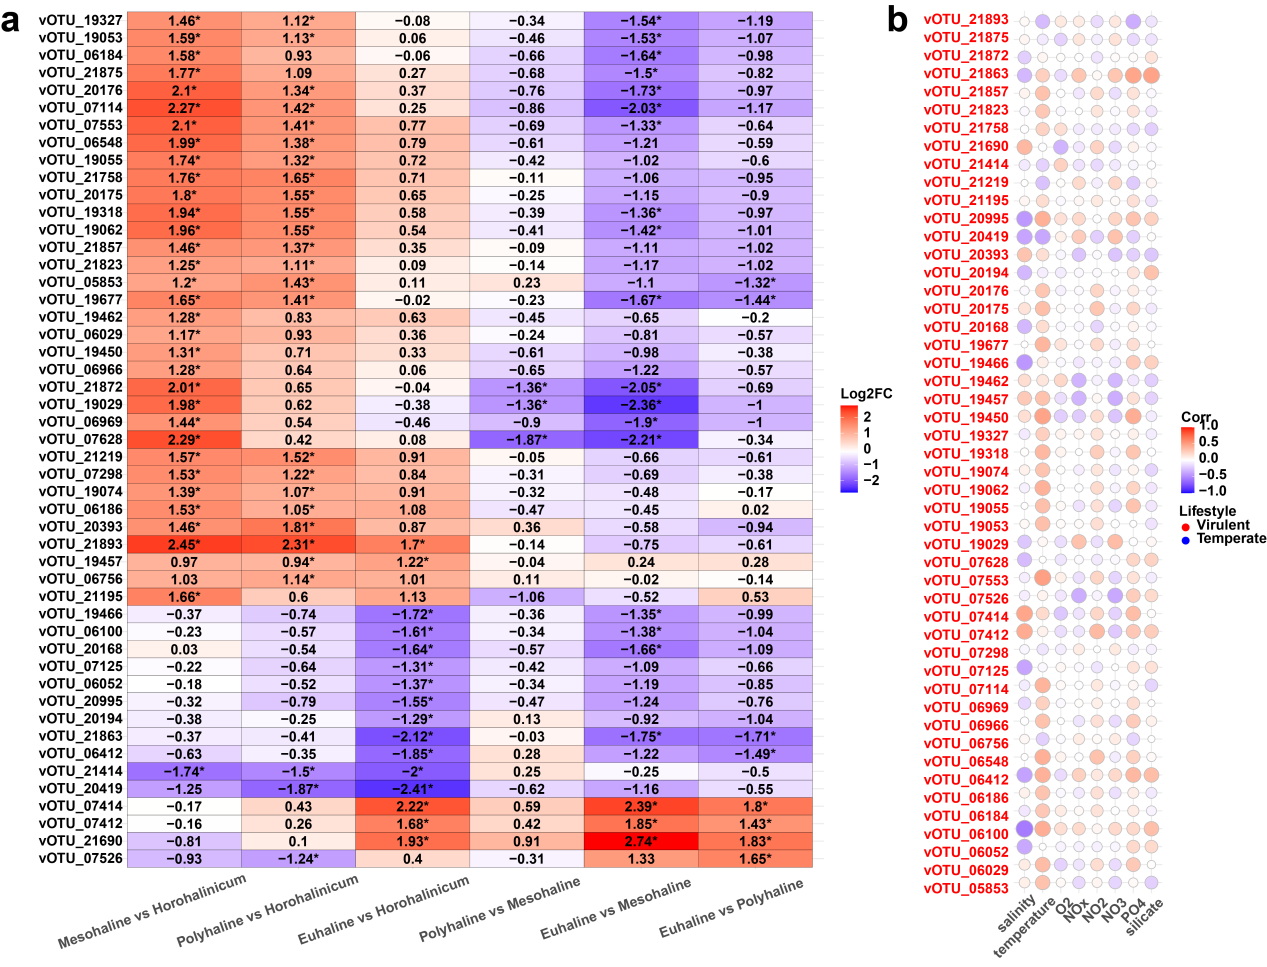


**Fig.S1 Differential Viral Populations and Their Environmental Correlates. a.** Heatmap of differential vOTUs identified using the ANCOM-BC2 trend test (*p* < 0.05). The log2 fold change values represent the relative abundance changes of vOTUs compared to each other and p-values are from ANCOM-BC2 pairwise directional test. Significant differences are indicated by asterisks (*p < 0.05, **p < 0.01, ***p < 0.001, ****p < 0.0001). **b.** Spearman correlation analysis of differential vOTUs with various environmental parameters (salinity (5.1-34.3PSU), temperature (9.8-29.5°C), dissolved oxygen (3.60-19mg L-1), and nutrient concentrations (NO3-: 0.320-20.956 μM; NO2-: 0.000-2.023 μM; silicate: 0.259-40.879 μM; PO43-:0.026-4.876 μM).), with color-coded font indicating the strength and direction of the correlations: red for positive correlations and blue for negative correlations. The color represents the correlation coefficient, which ranges from -1 to 1 with a gradient from blue to red. Deeper colors indicate stronger correlations. The size of the circle represents the *p*-value, with smaller *p*-values corresponding to larger circles.


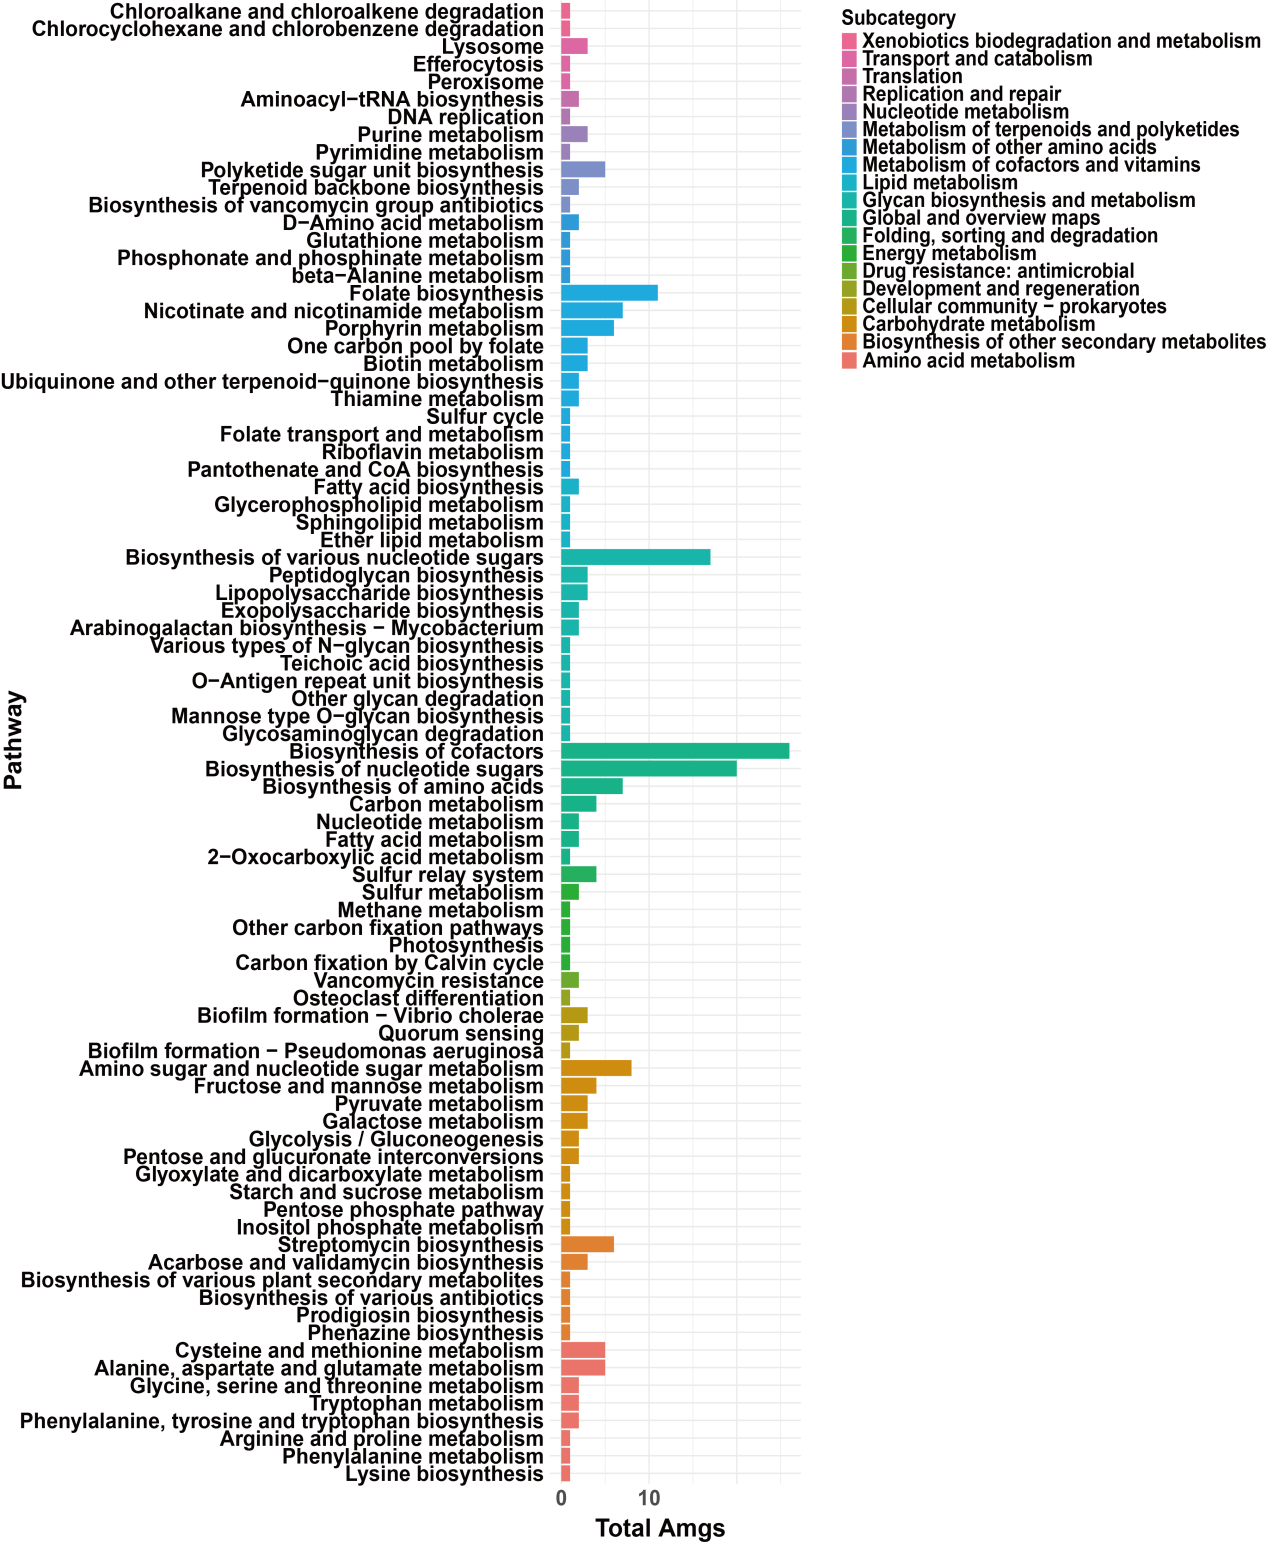


**Fig.S2 Functional distribution of Ulva-associated bacterial phage AMGs based on KEGG Orthologs (KO).**

####
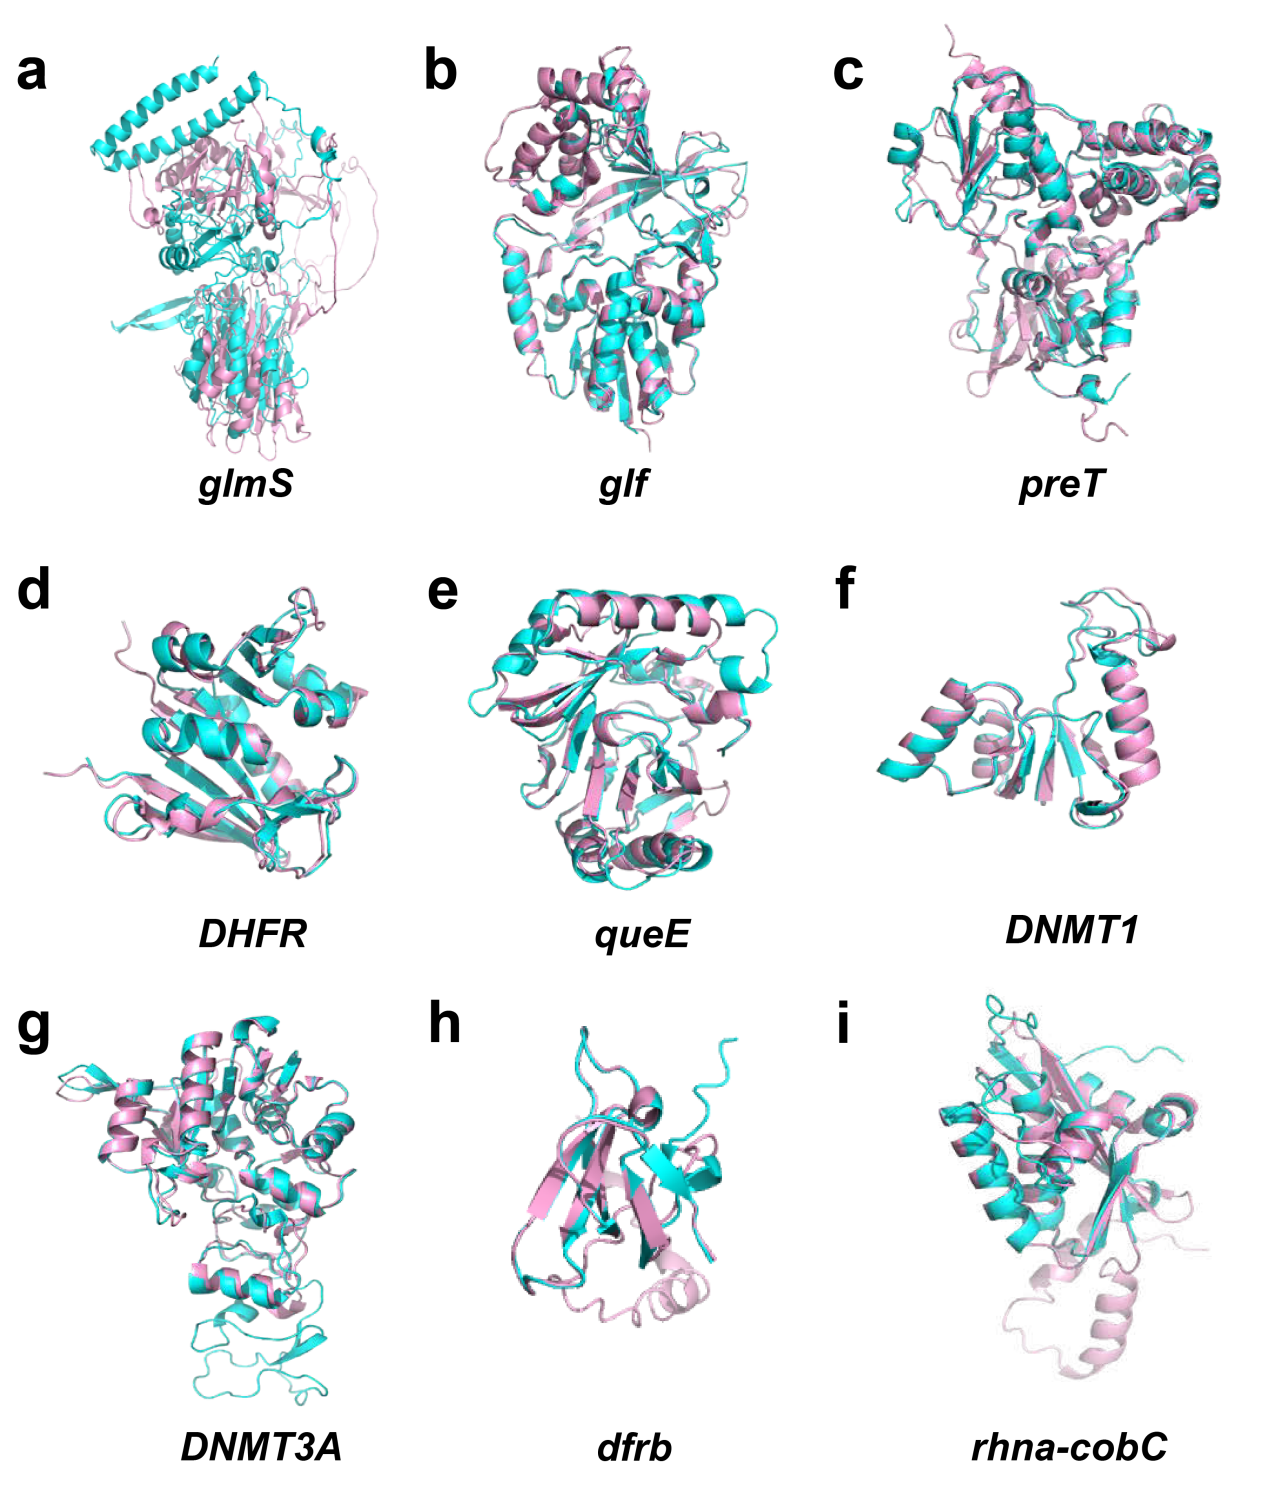


**Fig.S3 Structural models of phage‑encoded AMGs**. Three‑dimensional ribbon representations of nine AMGs (*glmS*, *glf*, *preT*, *DHFR*, *queE*, *DNMT1*, *DNMT3A*, *dfrB*, *rhnA‑cobC*) are shown. Blue indicates the protein structures derived from the phage genomes, while pink denotes the highly similar homologous proteins from bacterial sources.
